RESEARCH ARTICLE

# Dissecting the Effects of Ischemia and Reperfusion on the Coronary Microcirculation in a Rat Model of Acute Myocardial Infarction

Maurits R. Hollander<sup>1,2</sup>, Guus A. de Waard<sup>1,2</sup>, Lara S. F. Konijnenberg<sup>1,2</sup>, Rosalie M. E. Meijer-van Putten<sup>1,2</sup>, Charissa E. van den Brom<sup>2,3</sup>, Nanne Paauw<sup>4</sup>, Helga E. de Vries<sup>4</sup>, Peter M. van de Ven<sup>5</sup>, Jurjan Aman<sup>2,6</sup>, Geerten P. Van Nieuw-Amerongen<sup>2,6</sup>, Peter L. Hordijk<sup>2,6</sup>, Hans W. M. Niessen<sup>2,7</sup>, Anton J. G. Horrevoets<sup>2,4</sup>, Niels Van Royen<sup>1,2\*</sup>

**1** Department of Cardiology, VU Medical Center, Amsterdam, The Netherlands, **2** Institute for Cardiovascular Research, VU Medical Center, Amsterdam, The Netherlands, **3** Department of Anesthesiology, VU Medical Center, Amsterdam, The Netherlands, **4** Department of Molecular Cell Biology and Immunology, VU Medical Center, Amsterdam, The Netherlands, **5** Department of Epidemiology and Biostatistics, VU Medical Center, Amsterdam, The Netherlands, **6** Department of Physiology, VU Medical Center, Amsterdam, The Netherlands, **7** Department of Pathology and Cardiac Surgery, VU Medical Center, Amsterdam, The Netherlands

\* [n.vanroyen@vumc.nl](mailto:n.vanroyen@vumc.nl)

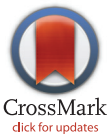

OPEN ACCESS

**Citation:** Hollander MR, de Waard GA, Konijnenberg LSF, Meijer-van Putten RME, van den Brom CE, Paauw N, et al. (2016) Dissecting the Effects of Ischemia and Reperfusion on the Coronary Microcirculation in a Rat Model of Acute Myocardial Infarction. PLoS ONE 11(7): e0157233. doi:10.1371/journal.pone.0157233

**Editor:** John Calvert, Emory University, UNITED STATES

**Received:** February 11, 2016

**Accepted:** May 26, 2016

**Published:** July 8, 2016

**Copyright:** © 2016 Hollander et al. This is an open access article distributed under the terms of the [Creative Commons Attribution License](https://creativecommons.org/licenses/by/4.0/), which permits unrestricted use, distribution, and reproduction in any medium, provided the original author and source are credited.

**Data Availability Statement:** All relevant data are within the paper, and supporting information is held in the figshare database (DOI [10.6084/m9.figshare.3204580](https://doi.org/10.6084/m9.figshare.3204580)).

**Funding:** This study was supported by the Institute for Cardiovascular Research of the VU University of Amsterdam (ICaR-VU). GPvNA was supported by the Netherlands Heart Foundation (NHF) (The Hague, grant 2011T072). The funders had no role in study design, data collection and analysis, decision to publish, or preparation of the manuscript.

## Abstract

### Background

Microvascular injury (MVI) after coronary ischemia-reperfusion is associated with high morbidity and mortality. Both ischemia and reperfusion are involved in MVI, but to what degree these phases contribute is unknown. Understanding the etiology is essential for the development of new potential therapies.

### Methods and Findings

Rats were divided into 3 groups receiving either 30 minutes ischemia, 90 minutes ischemia or 30 minutes ischemia followed by 60 minutes reperfusion. Subsequently hearts were ex-vivo perfused in a Langendorff-model. Fluorescence and electron microscopy was used for analysis of capillary density, vascular permeability and ultrastructure. Most MVI was observed after 30 minutes ischemia followed by 60 minutes reperfusion. In comparison to the 30' and 90' ischemia group, wall thickness decreased ( $207.0 \pm 74$  vs  $407.8 \pm 75$  and  $407.5 \pm 71$ ,  $p = 0.02$ ). Endothelial nuclei in the 30'-60' group showed irreversible damage and decreased chromatin density variation ( $50.5 \pm 9.4$ ,  $35.4 \pm 7.1$  and  $23.7 \pm 3.8$ ,  $p = 0.03$ ). Cell junction density was lowest in the 30'-60' group ( $0.15 \pm 0.02$  vs  $2.5 \pm 0.6$  and  $1.8 \pm 0.7$ ,  $p < 0.01$ ). Microsphere extravasation was increased in both the 90' ischemia and 30'-60' group.

### Conclusions

Ischemia alone for 90 minutes induces mild morphological changes to the coronary microcirculation, with increased vascular permeability. Ischemia for 30 minutes, followed by 60

**Competing Interests:** The authors have declared that no competing interests exist.

**Abbreviations:** CD31, Cluster of differentiation 31; CMR, Cardiac Magnetic Resonance; HE, Hematoxylin & Eosin; IHC, Immunohistochemistry; IMH, Intramyocardial Hemorrhage; LAD, Left Anterior Descending artery; MFI, Mean fluorescence intensity; MKHB, Modified Krebs-Henseleit buffer; MVI, Microvascular Injury; PCI, Percutaneous Coronary Intervention; PECAM-1, Platelet endothelial cell adhesion molecule 1; STEMI, ST-segment Elevated Myocardial Infarction; TEM, Transmission Electron Microscopy.

minutes of reperfusion, induces massive MVI. This shows the direct consequences of reperfusion on the coronary microcirculation. These data imply that a therapeutic window exists to protect the microcirculation directly upon coronary revascularization.

## Introduction

ST-segment elevated myocardial infarction (STEMI) is treated with direct revascularization by percutaneous coronary intervention (PCI). Although PCI has dramatically improved outcome in STEMI patients, it poses a new challenge. Despite a successful opening of the culprit vessel, in 40–50% of patients a part of the cardiac microvasculature remains non-perfused [1]. This is known as the no-reflow phenomenon and because it mostly affects the microvasculature, it is also referred to as microvascular injury (MVI)[2]. In the past decades it has become apparent that the presence of MVI is associated with a high morbidity and mortality [3, 4]. The worldwide prevalence of coronary artery disease affirms the urgency of adequate therapy. Unfortunately, despite several efforts no such therapy is available yet, because of limited knowledge on the pathophysiological mechanisms leading to MVI.

Evidently, the manifestation of MVI follows a period of ischemia and since MVI is predominantly located in the infarct core, it is theorized that ischemia plays a role in the development of MVI. This is demonstrated by Tarantini et al. who found a positive correlation of duration of ischemia and microvascular obstruction with magnetic resonance imaging (4). However the effects of ischemia on cardiomyocytes and endothelial cells are not equivalent. While infarct size mostly develops during ischemia[5, 6] the maximum extent of MVI is not found directly after ischemia, but rather develops over time after reperfusion. Several animal and clinical studies have shown that peak size of MVI lies >2 hours post infarction [7, 8]. This suggests that reperfusion has an additive harmful effect on the microvasculature. Because both phases are thought to play a role in the occurrence of MVI, the cascade is labeled as ischemia-reperfusion damage.

One of the hallmarks of MVI is the extravasation of erythrocytes and the development of intramyocardial hemorrhage (IMH)[9]. Experiments from over 4 decades ago show the presence of IMH in the area of no-reflow[10] and more recent studies have further linked CMR based MVI with the extravasation of erythrocytes[11, 12]. This contradicts the paradigm that MVI is based on obstruction (e.g. by erythrocyte plugging), and suggests that the microvascular integrity itself is affected (i.e. there is vascular leakage), already in the very early phases of reperfusion STEMI. It is evident that both ischemia and reperfusion are essential for the occurrence of MVI, but it remains unclear to what degree both phases contribute to the damage of the microvascular wall and its integrity.

Previous pathophysiological studies on this topic have used several *in-vivo* models, either with ischemia alone or followed by reperfusion. Although this approach is insightful, it fundamentally cannot discriminate the effects of both phases. Ischemia-induced vascular leakage only becomes visible when flow (i.e. reperfusion) is administered, but *in-vivo* this induces possible additional damage. Also, only a few studies have focused specifically on vascular wall integrity and occurrence of IMH and most ultrastructural analyses are not qualitative.

This study is designed to compare the *in-vivo* effects of ischemia alone or ischemia-reperfusion in a rat model, with the addition of *ex-vivo* reperfusion and microsphere infusion in a Langendorff set-up. This allows the vascular leakage to become apparent, without introducing potential additional harmful effects of *in-vivo* reperfusion and it facilitates quantification of

vascular leakage. Also, ultrastructural analysis of the microvasculature was performed via transmission electron microscopy (TEM).

## Methods

### Animals

All experiments were conducted with the approval of the Animal Welfare Committee of the VU University Amsterdam. 30 male Wistar rats (Harlan Laboratories, age 10 weeks, weight 300–400 gram) were acclimatized for two weeks and housed in groups of four animals. Group size was estimated based on 0.20 difference in mean, with a standard error of 0.15 and 0.8 power. Diet consisted of CHOW pellets and water *ad libitum*. Rats were housed in a temperature-controlled room (20–23°C; 40–60% humidity) under a 12/12h light/dark cycle starting at 6.00 am and inspected and weighed daily.

### Ischemia-reperfusion

Rats were divided in three groups. The first group (n = 10) received 30 minutes of cardiac ischemia and 0 minutes of *in-vivo* reperfusion, the second group (n = 10) received 90 minutes of cardiac ischemia and 0 minutes of *in-vivo* reperfusion, the third group (n = 10) received 30 minutes of cardiac ischemia, followed by 60 minutes of *in-vivo* reperfusion.

All rats were anesthetized with 5% isoflurane in an induction box and received a subcutaneous injection of buprenorphine (0.003mg/mL/100gBW). Subsequently rats were intubated and ventilated with 3% sevoflurane in oxygen enriched air (frequency 70/min). Rats were partly shaved and fixated on a heated table. Animals were connected to a 3 lead electrocardiographic continuous monitoring system (LabChart software, ADInstruments, Colorado Springs, CO). Chest wall was opened as described previously[13] and the pericardium was removed to bring the left anterior descending coronary artery (LAD) in sight. LAD was then ligated proximally, 1 mm below the left atrium, with a suture (5–0 Prolene) and a temporary ligation device. In the third group, after 30 minutes of ischemia, the ligation was removed, and animals received 60 minutes of *in-vivo* reperfusion.

### Langendorff model

The Langendorff set-up enables controlled *ex-vivo* coronary perfusion with a perfusion medium. The main part of the installation consists of a steel fixation cannula, a pressure transducer, a fluid access valve, a heat exchanger and a height adjustable heated flow-over reservoir. The reservoir was continuously filled by a peristaltic pump with perfusion medium. The perfusion medium was a modified Krebs-Henseleit buffer (MKHB), which consisted of (in mM) 118.5 NaCl, 4.7 KCl, 1.4 CaCl<sub>2</sub>, 25 NaHCO<sub>3</sub>, 1.2 MgCl<sub>2</sub>, 1.2 KH<sub>2</sub>PO<sub>4</sub>, and 11 glucose, which was freshly prepared and continuously oxygenated with carbogen gas (95% O<sub>2</sub>, 5% CO<sub>2</sub>), as described earlier[14]. Both the heat exchanger and the heated reservoir were set on such a temperature that the perfusion medium exiting the system was constantly 37°C. At the start of each experiment the system was cleaned, filled with fresh modified Krebs-Henseleit Buffer and air bubbles were filtered out. Also the pressure transducer was calibrated and monitored using Powerlab instrumentation (ADInstruments, Colorado Springs, CO).

After the above described periods of ischemia (and reperfusion) the aorta was cut distally of the aortic arch. In the 30–0 and 90–0 group, the temporary ligation device was then removed and the heart was excised as quickly as possible, taking care the myocardium and ascending aorta were not damaged. The excised heart was submerged directly in ice-cold perfusion medium to induce cardioplegia. Thereafter any unwanted tissue was removed and the

ascending aorta dissected, leaving approximately 4mm for the fixation onto the cannula. The ascending aorta and the cannula were filled with perfusion fluid to prevent air embolisms. The heart was mounted onto the cannula and fixed with silk thread. The pressure of the perfusion medium was then slowly raised using a roller clamp until the heart started contracting again. Perfusion pressure was then steadily increased to 90 mmHg (Safedraw Transducer Blood Sampling Set, Argon Medical Devices, Texas, USA). Perfusion in the Langendorff setup was continued for 5 minutes.

### Fluorescent Microspheres

For the quantification of vascular leakage fluorescent microspheres (Fluospheres® carboxylate-modified, 0.1µm, 540/560; Life Technologies, Thermo Fisher Scientific, MA, USA) were used in 12 rats (4 per group). After mounting in the Langendorff setup, the hearts were perfused with MKHB until heart rate was stable. Subsequently a Fluosphere mix ( $3.6 \times 10^{12}$  microspheres suspended in 1mL MKHB) was slowly added to the perfusion medium. After the addition of the mix, the heart was perfused with normal MKHB for 5 minutes, to remove any microspheres from inside the vasculature.

### Tissue preparation

After 5 minutes of Langendorff perfusion protocol, the heart was removed from the cannula and submerged in ice-cold MKHB to induce cardioplegia. Then the heart was transected into 5 slices of approximately equal thickness. Of each slice a biopsy (1x2mm) was taken from the center of the infarct zone, and one additional biopsy was taken from the posterior wall of the most basal slice, which served as a control. The biopsies were then fixed in 3% glutaraldehyde for ultra-structural analyses on the electron microscope. The remaining slices were snap frozen in liquid nitrogen for immunohistochemistry.

### Transmission Electron Microscopy

After adequate fixation in glutaraldehyde the biopsies underwent a secondary fixation with osmium tetroxide, dehydrated and embedded in epoxy resin (EPON, Miller-Stephenson, USA). After curing, 60–80 nm thick slices were cut with a Leica UC Ultra Microtome and placed on grids. Grids were then positively post stained with lead acetate and uranyl acetate. All samples were analyzed with a transmission electron microscope (CM 100 Bio, Philips, Eindhoven, The Netherlands), attached with a side-mounted TEM CCD camera (Morada G2, Olympus, Tokyo, Japan). Images were taken from capillaries at a magnification  $\geq 5200x$ , with an exposure time of 200ms. For image processing and analysis iTEM software (OSIS, Tokyo, Japan) was used. Quantification of vessel characteristics was done in a blinded manner. Total vessel area, lumen area and nucleus area were manually delineated. Per animal 20 capillaries were analyzed. Endothelial cytoplasm area (including organelles) was calculated by subtracting lumen and nucleus area from the total vessel area. Mean cytoplasm thickness was calculated by dividing the cytoplasm area by the cytoplasm perimeter. Caveolae were counted and defined as total number per capillary. Chromatin density variation was determined by calculating the standard variation of grey values with the nuclear area.

### Immunohistochemistry

Frozen tissue samples were sectioned in slices of 5 micrometer. Sections of all samples were stained with hematoxylin and eosin (HE) and scanned with a Mirax slide scanner system using a 20× objective (3DHISTECH, Budapest, Hungary). Based on the HE images tissue samples

with the largest area of infarction (containing infarct core) were selected for further immunohistological analysis. For the detection of smooth muscle cells, sections were stained using an antibody for smooth muscle actin (clone 1A4, Dako, 1:100). For the detection of endothelial cells (e.g. capillaries) an antibody for CD31 was used (PECAM-1, M20, Lot C0514, Santa Cruz Biotechnology, 1:50). Nuclei were stained with Hoechst (1:50000). Capillary density was calculated in a blinded manner as the average number of CD31<sup>+</sup> SMA<sup>-</sup> vessels per mm<sup>2</sup>, using a fixed frame of 200x200 mm<sup>2</sup>. Capillary density was calculated for the infarct core and the border zone, as well as controls.

## Statistics

To test for differences between three groups and control, a one-way analysis of variance (ANOVA) was used. When the ANOVA was significant, post-hoc analyses was performed according to Tukey's method to compare between groups. Only significant post-hoc p-values are depicted in the figures. All results were considered statistically significant if the two-sided P-value was <0.05. For separate comparison of means between two groups a student's t-test was used. Statistical analysis was performed with Statistical Package for Social Sciences software (SPSS 20.0 for Windows, SPSS Inc).

## Results

### Vascular leakage

Vascular leakage was quantified *ex vivo* by the detection of fluorescent microspheres extravasation in a Langendorff perfusion setting after excision of the infarcted rat hearts from the 3 groups. Mean fluorescent intensity (MFI) of the microspheres was calculated in the infarct zone and control zone (Fig 1A and 1B), and expressed as a ratio between both zones (Fig 1C) In the 30–0 group MFI was comparable with control (ratio 1.2). The 90–0 group showed a 3 fold increase of MFI in the infarct zone as compared to control. This increase was also present in the 30–60 group, where the ratio between infarct and control was comparable to the 90–0 (Fig 1C).

In the 30–60 group microspheres were found to be heterogeneously distributed in the infarct zone. Mean fluorescence intensity in the border zone of the infarct area in the 30–60 group was significantly increased, as compared with core of the infarct area ( $p = 0.02$ ; Fig 1D). This difference was not found in the groups that underwent 30 or 90 minutes of ischemia, without *in-vivo* reperfusion.

All vascular lumina were devoid of microspheres, indicating successful coronary rinsing with normal perfusion fluid after perfusion with microsphere mix. Pixel-based colocalisation of microspheres and CD31 positive cells were similar in all groups ( $\approx 25\%$ ), indicating the extravasation of microspheres (Fig 1E).

### Capillary density

Using immunohistochemistry, the mean number of CD31<sup>+</sup> SMA<sup>-</sup> capillaries (per square millimeter (i.e. capillary density) was quantified in both infarct area and control area in all groups. IHC based capillary density in control samples was equal in all groups ( $p = 0.36$ )(Fig 2A). Within groups capillary density was comparable in 30–0. In the 90–0 and 30–60 group there was a significant decrease in the capillary density in the infarct zone, as compared with control ( $1283 \pm 57.9$  vs  $638.1 \pm 66.3$ ,  $p = 0.02$ ).

Capillary density was also quantified using transmission electron microscopy and defined as the number of visible capillaries per square millimeter. The TEM based capillary density was comparable between control samples of all groups ( $p = 0.71$ ). In the infarct tissue the capillary



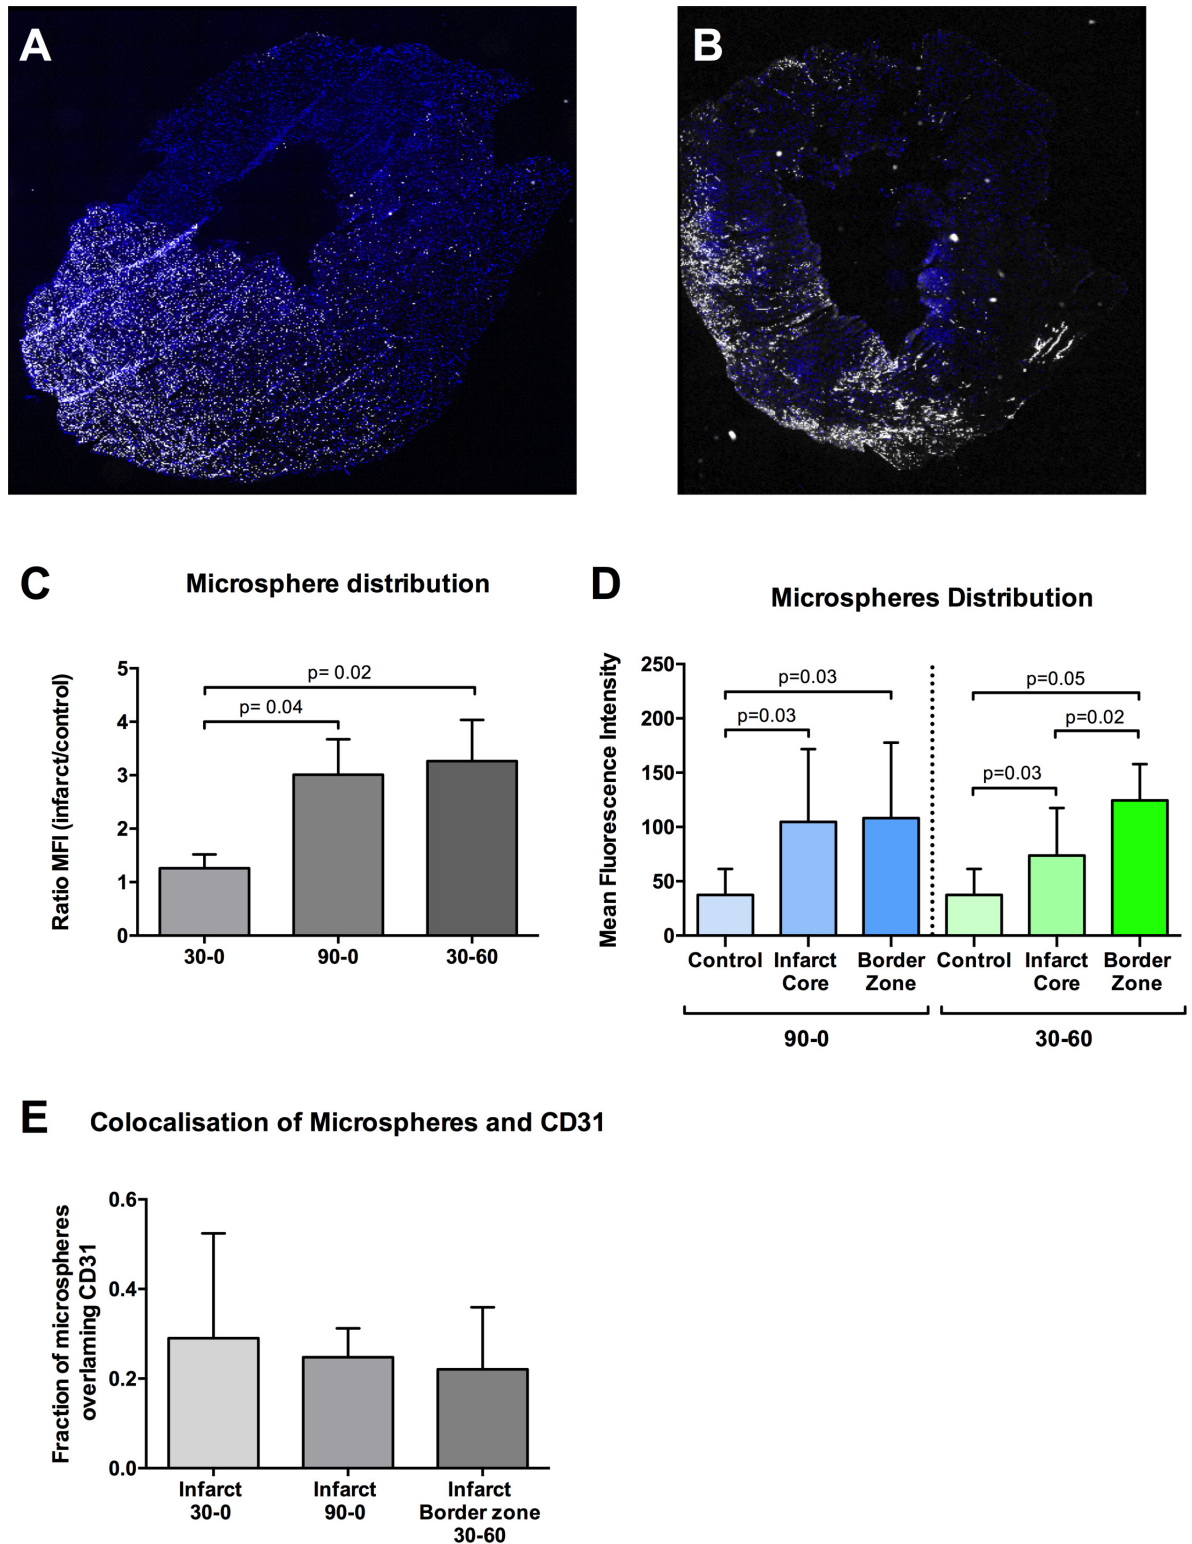

**Fig 1. Distribution of fluorescent microspheres.** **A-B** Images of transverse slices of the left ventricle, showing distribution of fluorescent microspheres (white). Nuclei are stained with Hoechst (blue). Red arrow: infarct zone, asterisk: control zone. **A-B** represents group 90–0 and 30–60 respectively. White bars represent 1mm. **C** Distribution of MFI within the 90–0 and 30–60 group **D** Mean fluorescent intensity (MFI) of fluorescent microspheres, expressed a ratio between infarct area and control area. **E** Pixel-based colocalisation analysis of fluorescent microspheres and CD31 positive tissue for extravasation.

doi:10.1371/journal.pone.0157233.g001

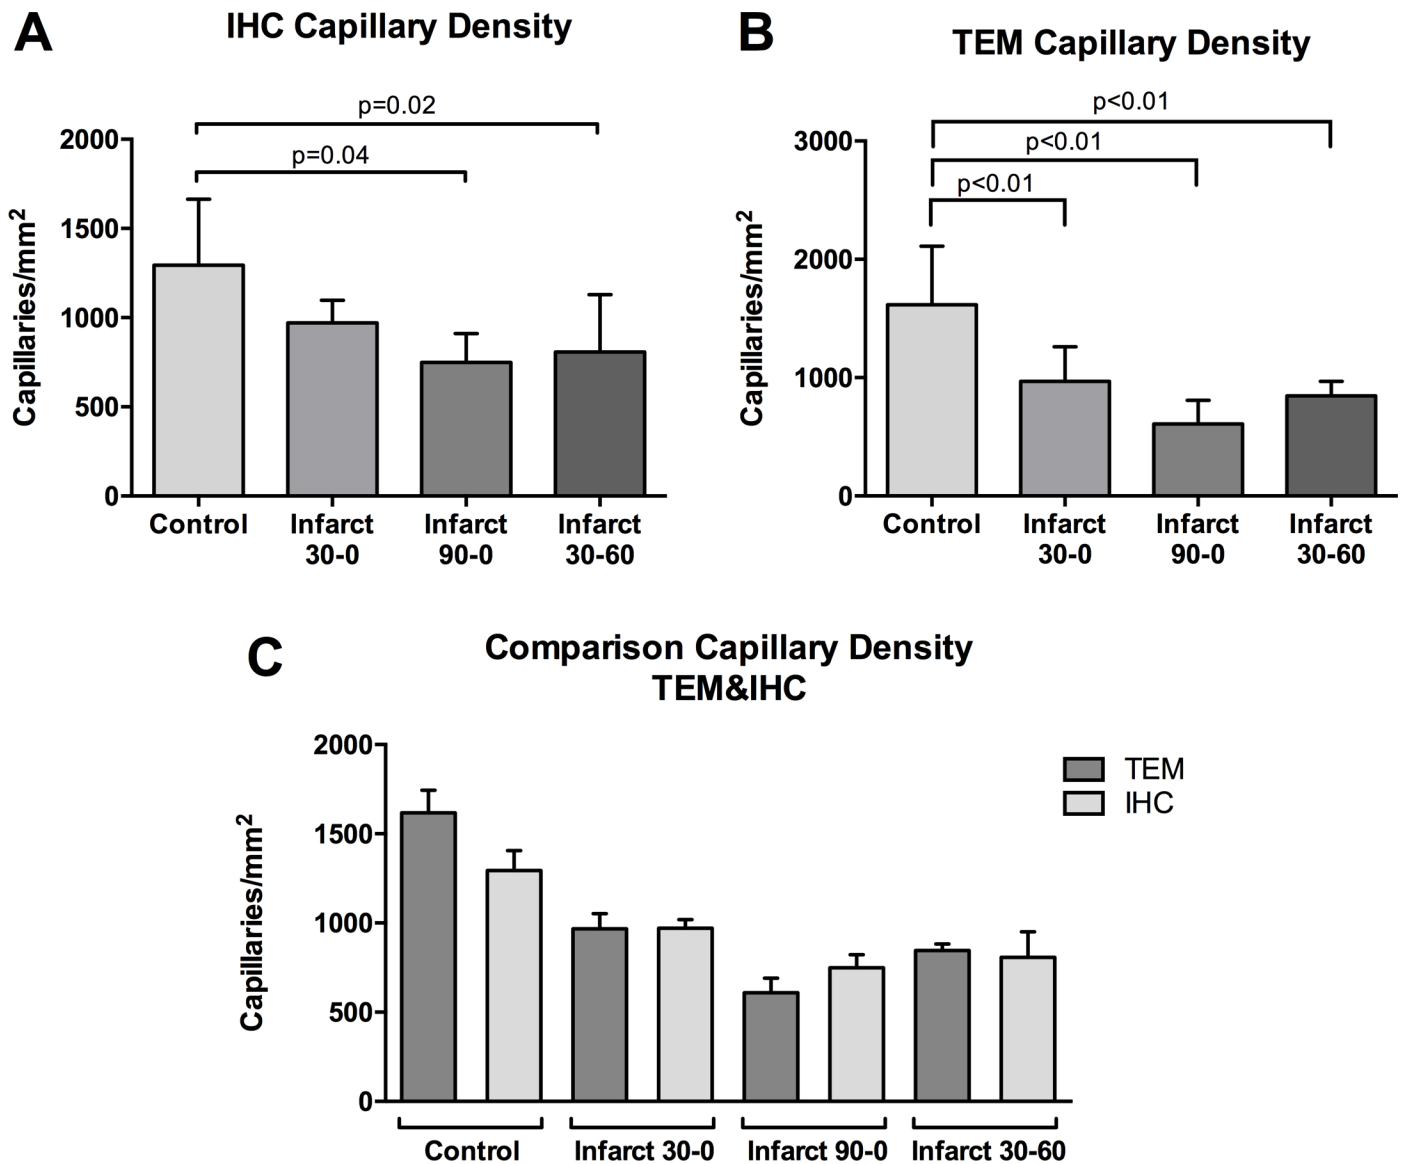

**Fig 2. Capillary density.** Immunohistochemical analysis of frozen tissue samples. **A** Quantification of capillary density by immunohistochemistry (IHC). **B** Quantification of capillary density by Transmission Electron Microscopy (TEM). **C** Comparison of capillary density between TEM and IHC. Capillary density is expressed as the number of capillaries per square millimeter.

doi:10.1371/journal.pone.0157233.g002

density differed between groups. In the 30-0 group the infarct zone capillary density was  $1586 \pm 435$ , which was statistically comparable to the 90-0 group ( $1716 \pm 283$ ) and 30-60 group ( $1185 \pm 172.6$ ). Only the 30-60 group showed a significant decrease in capillary density compared to control ( $p < 0.01$ , Fig 2B).

Interestingly, in all groups capillary density as was lower when measured with IHC, as compared to TEM ( $p < 0.01$ ; Fig 2C).

### Ultrastructural analysis

Transmission electron microscopy images showed no clear pathologic characteristics of vascular structures in the 30-0 group, which received 30 min ischemia without reperfusion (Fig 3A).

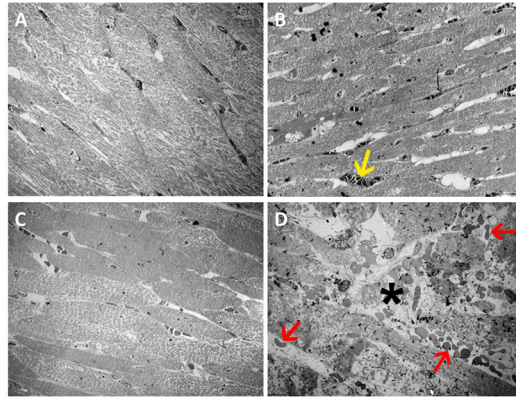

**Fig 3. Overview of TEM Images.** Transmission electron microscopy images, overview images, magnification 560x. **A** Images from control samples. **B-D** Images from infarct zone samples. **B** 30–0 group, **C** 90–0 group, **D** 30–60 group. Massive tissue damage is visible (asterisk), with extravasation of erythrocytes (red arrow), and intraluminal erythrocytes (yellow arrow). White bar represents 10 micrometer.

doi:10.1371/journal.pone.0157233.g003

All blood vessels were intact and showed complete absence of blood cells, which affirms adequate and complete Langendorff perfusion. Cardiomyocytes were normally aligned and showed clear Z- and M-bands. Mitochondria also showed normal structure and size. Overall there were no differences with the paired control samples. In the infarct zone of the 30–0 group a similar pattern could be seen, with erythrocytes occasionally visible, but always within the vasculature (Fig 3B). In the 90–0 group which received 90 minutes ischemia without reperfusion, blood vessel integrity was also intact. Furthermore, lumina were completely empty, indicating successful Langendorff perfusion with transparent buffer. Macroscopically, there were no signs of ischemic damage to cardiomyocytes at 90 minutes of ischemia (Fig 3C). In the 30–60 group cardiac tissue in the infarct zone was clearly disrupted, showing extensive damage with misalignment of cardiomyocytes, disruption of capillaries and massive extravasation of erythrocytes (i.e. intramyocardial hemorrhage)(Fig 3D). When studied in more detail, endothelial cells, displayed normal morphology in the control samples and in the infarct zone of the 30–0 group (Fig 4A and 4B). In the infarct zone of the 90–0 group capillary endothelial cells showed clear cytoplasmic blebbing and an increase in number of caveolae, both signs of endothelial cell activation (Fig 4C and 4E). Besides this, nuclear characteristics also showed marked alteration. In the 30–60 group, clear morphologic alterations were observed. Mitochondria were swollen and showed loss of cristae. Furthermore, mitochondria contained electron dense depositions as a sign of irreversible damage (Fig 4D). The nuclei of endothelial cells also showed signs of cell death, namely chromatin condensation. Vessel walls were generally thinner (Fig 4F) than normal and in some areas showed severe damage and loss of vascular integrity with erythrocytes located in the perivascular space (i.e. intramyocardial hemorrhage). No extravascular lymphocytes were observed. Ultra-high magnification TEM imaging allowed detailed quantitative analysis of capillaries, of which results are listed below.

### Mean vessel and lumen area

When different groups were compared no significant difference in mean vessel area in the infarct zone and the control zone was observed (infarct:  $36.8 \pm 8.6 \text{ nm}^2$  vs  $30.2 \pm 7.9 \text{ nm}^2$  vs  $49 \pm 20 \text{ nm}^2$ ; control  $19.56 \pm 3.0 \text{ nm}^2$  vs  $13.7 \pm 3.1 \text{ nm}^2$  vs  $19.7 \pm 4.0 \text{ nm}^2$ ,  $p = 0.33$ ; Fig 5A). When all groups were taken together, mean infarct vessel area was significantly higher than mean control vessel area ( $P = 0.04$ ). This significance was not reached when infarct and control were



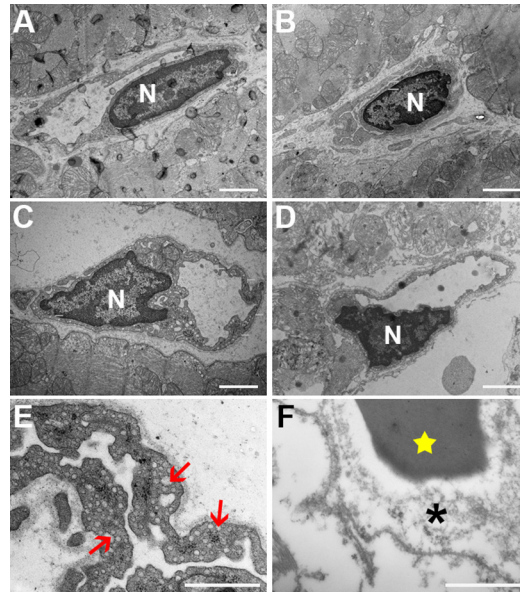

**Fig 4. Ultrastructural images.** Magnification A-D 10500x. **A** Capillary in the control tissue. **B** Capillary from infarct zone of the 30–0 group. In both A and B an intact continuous vessel wall can be seen. **C** Image depicts the 90–0 group and shows activated endothelium with abundant presence of caveolae and vesicles. Cytoplasm shows great variety in thickness, with multiple protrusions (white triangles). **D** Capillary from group 30–60 which shows severely damaged vessel wall with disruption of the basal membrane. **E** and **F** show detailed images with numerous caveolae (red arrows) and destruction of the vessel wall (asterisk). Also an erythrocyte can be seen (star). Nucleus indicated with the letter N. White bars represent 2 micrometer. Magnification E-F 24.500x.

doi:10.1371/journal.pone.0157233.g004

compared within groups (Fig 5A). Between groups, lumen area showed no difference ( $17.9 \pm 8.3 \text{ nm}^2$  vs  $9.75 \pm 3.4 \text{ nm}^2$  vs  $35.6 \pm 15.2 \text{ nm}^2$ , NS; Fig 5B). In all groups the infarct zone lumen area was significantly increased as compared to the control zone (mean difference  $15.7 \text{ nm}^2$ ,  $8.8 \text{ nm}^2$  and  $33.8 \text{ nm}^2$ ,  $p = 0.012$ ,  $p = 0.046$  and  $p = 0.011$  respectively; Fig 5B).

### Endothelial cytoplasm and nucleus area

Between groups there was no difference in endothelial cytoplasm area in the infarct zone (infarct:  $13.4 \pm 3.3 \text{ nm}^2$ ,  $9.0 \pm 2.6 \text{ nm}^2$  and  $7.8 \pm 3.3 \text{ nm}^2$ , NS; data not shown). Also within groups there was no difference in total cytoplasm area between infarct zone and control (mean difference  $4.4 \text{ nm}^2$ ,  $2.0 \text{ nm}^2$  and  $-3.7 \text{ nm}^2$ , NS; data not shown). Compared between groups there were no differences in the nucleus size in the infarct zone (infarct  $8.4 \pm 2.6 \text{ nm}^2$ ,  $9.9 \pm 2.2 \text{ nm}^2$  and  $7.7 \pm 2.8 \text{ nm}^2$ , NS; Fig 5C). Also within groups there was no difference in nuclear size between infarct zone and control (mean difference  $0 \text{ nm}^2$ ,  $4.2 \text{ nm}^2$  and  $1.2 \text{ nm}^2$ , all NS; Fig 5C).

When corrected for vessel circumference there was no difference in mean cytoplasm thickness (i.e. vessel wall thickness) between groups in the control zone (Fig 5D). The mean cytoplasm thickness in the infarct zones of the 30–0 and 90–0 group was also comparable. In the 30–60 group however mean cytoplasm thickness is significantly lower than the other groups (Fig 5D).

### Endothelial cell nuclei characteristics

Although nuclei showed no differences in average size, their appearance on TEM imaging was different between groups. Nuclei in the 30–0 group had a normal morphology and were similar

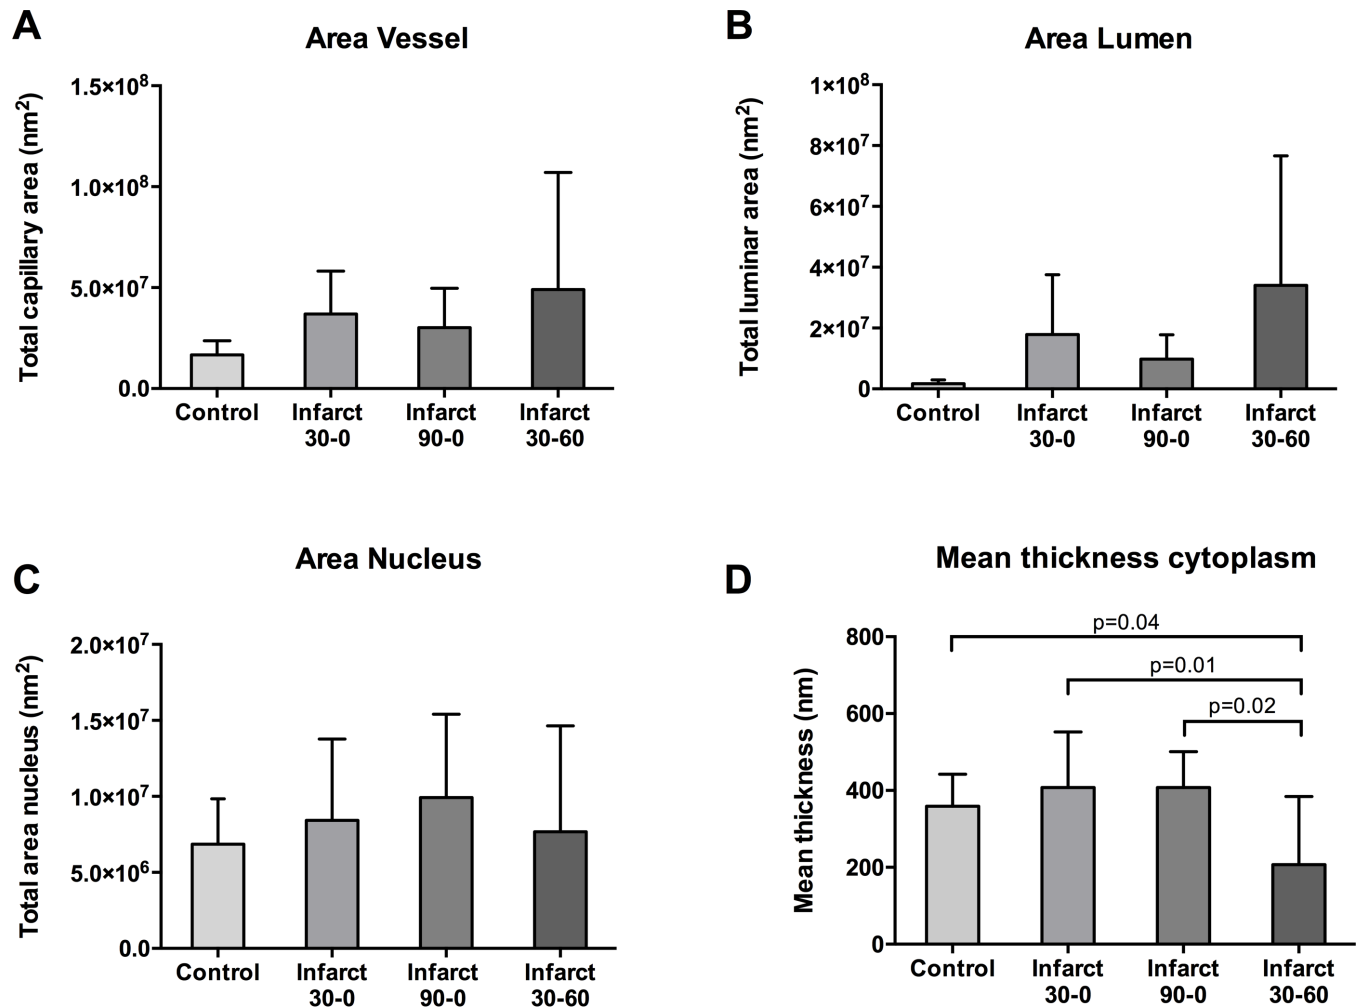

**Fig 5. Area measurements of microcirculation.** **A** Total vessel area in nm<sup>2</sup> (including cytoplasm, lumen and nucleus). **B** Area of vessel lumen in nm<sup>2</sup>. **C** Area of endothelial nuclei in nm<sup>2</sup>. **D** Mean thickness of the capillary cytoplasm in nm.

doi:10.1371/journal.pone.0157233.g005

to control samples (Fig 6A and 6B). In the 90-0 group endothelial nuclei showed some signs of early apoptosis, with DNA condensation on nucleus borders (Fig 6C). In the 30-60 group the morphologic changes were most dramatic, with a more homogenous appearance, indicative for end-stage apoptosis (Fig 6D). Control samples showed no signs of DNA degradation. DNA degradation resulted in less diverse chromatin distribution, which resulted in an uneven spread of grey intensity within the area of the nucleus between groups. The 30-0 group had a significantly higher chromatin density variation (CDV) than the 90-0 group (30-0: 50.5±9.4, 90-0: 35.4±7.1, p = 0.03). The 30-60 group had the lowest CDV (23.7±3.8), which was significantly lower than both the 30-0 group (p≤0.01) and control (p = 0.02), but not compared to the 90-0 group (p = 0.08) (Fig 6E).

### Cell-cell junctions and caveolae

Vascular integrity of the microcirculation is largely dependent on the endothelial cell-cell junctions, which limit interendothelial leakage of plasma components to the subendothelial space. At the capillary level these junctions can easily be seen with transmission electron microscopy,

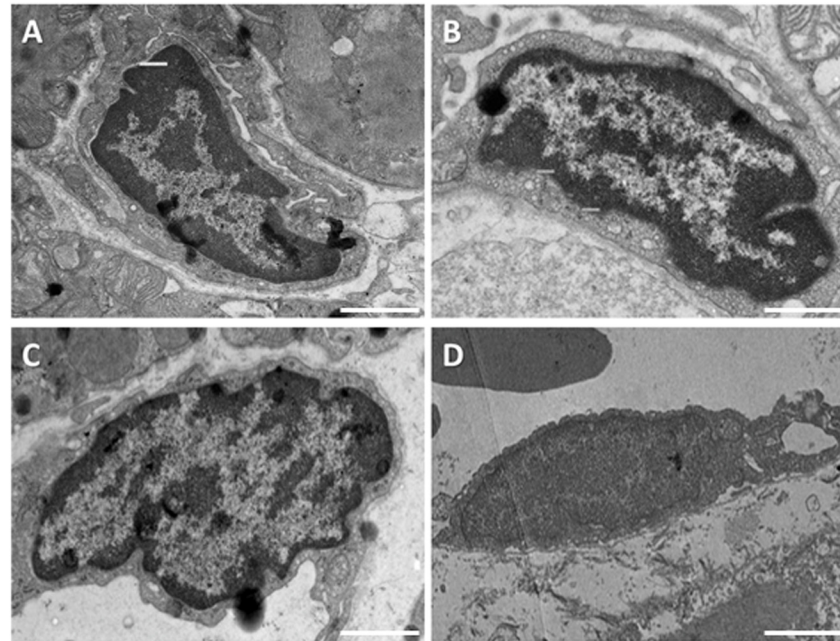

### Variation Chromatine density

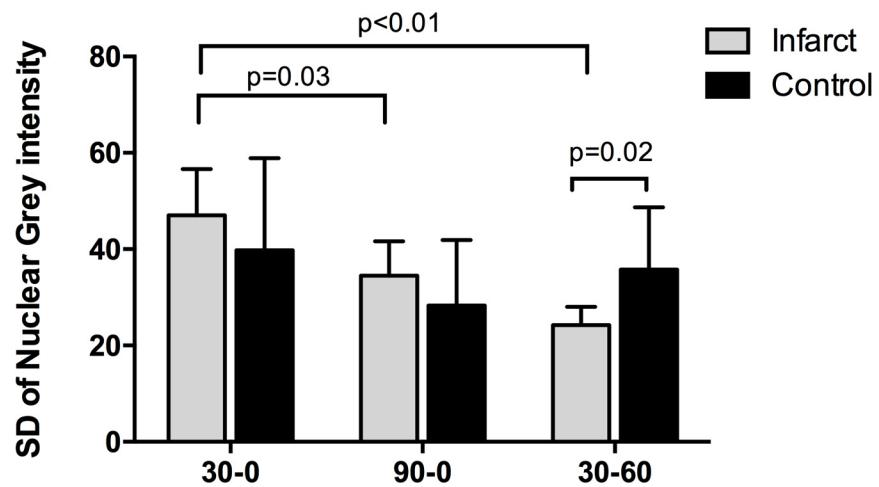

**Fig 6. Endothelial cell nuclei characteristics.** Top four images exemplify typical TEM images of infarct zone samples from different groups. **A-D** represent the control, and infarct zones of the 30–0, 90–0 and 30–60 group respectively. Magnification 12500x White bars represents 2 micrometer. **E** Quantification of chromatin density variation, using iTEM software.

doi:10.1371/journal.pone.0157233.g006

and quantified (Fig 7A). Number of visible junctions per capillary varied significantly between groups. The infarct zone of the 30–0 group showed a mean number of junctions per capillary of  $2.5 \pm 0.6$ , which was comparable with the 90–0 group ( $1.8 \pm 0.7$ , NS; Fig 7B). In contrast, the 30–60 group showed the lowest number of junctions per capillary ( $0.15 \pm 0.2$ ), which was significantly lower than both the 90–0 group ( $P < 0.01$ ) and the 30–0 group ( $P < 0.001$ ), indicating lower vascular integrity (Fig 7B). Transendothelial transport is facilitated by caveolae (transcytosis). The endothelial cells in the infarct area of the 30–60 group had significantly less caveolae than the 90–0 group ( $p = 0.01$ , Fig 7C). In the 90–0 there appeared an increase in number of

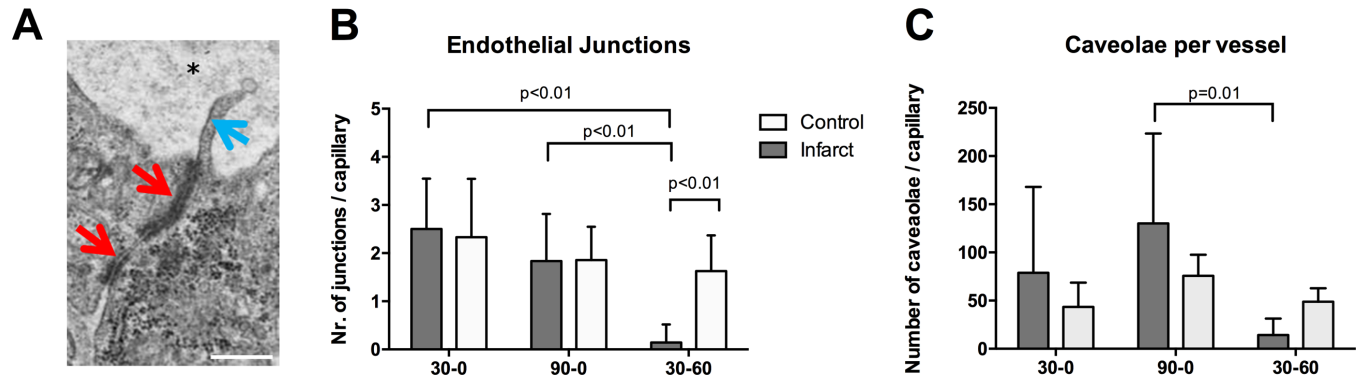

**Fig 7. Endothelial junctions and caveolae.** Quantification of endothelial cell-cell junctions. **A** Typical TEM image of a part of two endothelial cells with cell-cell junctions (red arrows). Protruding into the lumen of the capillary (asterisk) marginal fold can be seen (blue arrow). White bar represents 100 nanometer. Magnification 17500x. **B** Quantitative analysis showing the mean number of cell-cell junctions per capillary in the infarct zones in all three groups. **C** Mean number of endothelial caveolae per capillary, as determined with transmission electron microscopy.

doi:10.1371/journal.pone.0157233.g007

caveolae which did not reach significance due to high variability. The average size of the caveolae was comparable between groups (30–0: 100.2±12.35 nm, 90–0: 97.14±7.8 nm, 30–60: 81.25 ±26 nm, NS; Fig 7C).

## Discussion

In this study, we aimed to investigate the specific effects of ischemia and reperfusion on the coronary microcirculation in an experimental rat model. By using the combination of *in-vivo* ischemia (and reperfusion) and controlled *ex-vivo* perfusion in a Langendorff set-up, we could discriminate between the effects of these two phases. We show that compared to ischemia alone, the addition of reperfusion inflicts major additional damage on endothelial cells and increases vascular permeability. In the *in-vivo* reperfusion group the capillary wall thinned significantly, with a loss of visible cell-cell junctions.

Ischemia-reperfusion damage has been well described in literature and its impact on infarct size and left ventricular remodeling is paramount [15, 16]. The effects on the microcirculation however are less well described. Recently we observed in a porcine ischemia-reperfusion model major loss of the vasculature, accompanied by intramyocardial hemorrhage (IMH)[11]. However, the etiology of this vascular leakage is still not clear. In literature it is postulated that the post-ischemic microvasculature—which relies on anaerobic metabolism- cannot cope with sudden influx of oxygen, which is induced by reperfusion[17]. As a consequence reactive oxygen species are formed, which are believed to induce cell death. However, in a clinical setting ischemic post-conditioning showed no beneficial effect[18], which suggests other mechanisms are triggered after ischemia is relieved. Other factors that are suggested to play a role in ischemia-reperfusion damage are the influx of leukocytes, plasma proteins and the activation of the complement.

When the effects of ischemia-reperfusion on vascular integrity are studied *in-vivo*, it is however impossible to clearly distinguish the specific effects of ischemia and reperfusion. Without reperfusion vascular leakage does not become visible. This was recently elegantly shown by Fernández-Jiménez et al, who studied edema development during ischemia-reperfusion in pigs [19]. Also, intramyocardial hemorrhage does not occur in the infarct core (or only to a very limited extent) if the epicardial vessel is not reopened. However, the absence of vascular leakage or hemorrhage does not exclude ischemic damage to the vasculature. The Langendorff set-up allowed us to detect ischemia induced vascular permeability, without introducing potential

additional harmful effects of *in-vivo* reperfusion (caused by thrombocytes, leukocyte invasion [20] or erythrocyte extravasation [12]). Data from our study show that *in-vivo* reperfusion has a clear and large additional damaging effect on the coronary microcirculation. The increased vascular permeability in the 30–60 group is in line with other studies that report peak microvascular obstruction after >60 minutes of reperfusion [7, 8].

### Endothelial cells

In the acute setting, ischemia leads to morphologic changes of the endothelium. In all groups the lumina of the infarct-related capillaries were enlarged. This contradicts some studies that report vasoconstriction [21–23], but these studies are based on pressure measurements or done in hindlimb models. The enlarged lumina in our study maybe the result of transient post-occlusive hyperemia [24]. Ambrosio et al. showed that after coronary ischemia, regional microvascular blood flow increased during the early phase of reperfusion and remained upregulated even after 210 minutes of reperfusion [25]. This study also showed with transmission electron microscopy that after reperfusion the cytoplasm of endothelial cells is thinned and disrupted with a noticeable absence of transcytotic vesicles i.e. caveolae. Our data shows identical findings in the 30–60 group, underlining the additional destructive effects of reperfusion on the microvasculature.

### Chromatin condensation

We find considerable alterations in nuclear chromatin distribution of endothelial cells, most pronounced in the 30–60 group, followed by the 90–0 group and normal in the 30–0 group. Chromatin condensation (i.e. clumping) is indicative for irreversible cell damage and characterized by an irregular distributed chromatin in the nucleus. These changes are well described [26], but remain mostly qualitative. Some scoring techniques for electron microscopy images have been proposed [27, 28] but these remain subjective to some degree. There are other, more quantitative methods [29] but these rely on complex fluorescence imaging. We present a simple but quantitative method to investigate chromatin condensation and nuclear distribution, by analyzing the dispersion of grey values with the nucleus.

To some degree, the endothelial cells in the 90–0 group showed also vascular and endothelial damage, but not to the extent of the 30–60 group. The 90–0 group did show an increase in the number of cytoplasmatic caveolae, which implies endothelial activation. The exact role of these vesicles remains unclear, but they are associated with cardiac pathology and currently widely studied [30, 31]. Alteration in the number of caveolae after ischemia was already described by Kloner several decades ago [10]. More recently it is suggested that the formation of chains of caveolae creates transcytoplasmic pores, that accelerate vascular permeability [32] and that caveolae are also an essential component of endothelial cell signaling after abrupt reduction of flow [33].

### Vascular leakage

In our study vascular leakage was quantified using the ex-vivo administration of fluorescent microspheres. Most of the microspheres (0.1 micrometer) extravasated in the 90–0 and 30–60 group. Interestingly, in the 30–60 group the infarct core contained hardly any fluorescent spheres and the border zone showed to have a 3-fold increase in MFI, as compared to control. This heterogeneous distribution was not seen in the other groups. This means that after 90 minutes of ischemia alone, the spheres were able to reach the complete infarct area, but after 30 min of ischemia followed by 60 minutes of reperfusion, the infarct core was not accessible for the spheres, indicating no-reflow. This very much resembles the clinical situation, showing



increased magnetic resonance imaging contrast accumulation in the border zone of the infarct and absence on contrast in the core of the infarct[11]. The increased vascular permeability was accompanied by a decrease in the number of visible cell junctions per vessel after 60 minutes *in-vivo* reperfusion. These junctions play an important role in vascular integrity[34]. Comparable data on junction loss is described in an ischemia-reperfusion model in the lung[35], brain [36] [37] and kidney[38]. Interestingly the microspheres extravasation in the 90–0 group was not accompanied with a loss of visible junctions. Possibly the very small size of the microspheres (100nm) allowed for early extravasation, even when number of endothelial cell-cell junctions is not visibly decreased. Alternatively, they can be transported via transcytosis based on the apparent increased number of caveolae specifically in the 90–0 group.

### Capillary density

Functional capillary density is known to decrease as early as 20 min after coronary artery clamping followed by short reperfusion [39]. In our study we don't see a decrease of capillary density after 30 minutes of ischemia. Capillary density was found to be significantly decreased in the infarct zone of the 30–60 group, compared to control and measured by both immunohistochemistry and TEM. In the 90–0 group, a similar effect was also seen with IHC indicating ischemia alone does affect the microvasculature. Interestingly, in our study, capillary density did differ between imaging techniques. In all groups the capillary density measured by TEM was significantly higher than measured by IHC (Fig 2C), which could be explained by a change in CD31 activity/availability or an incomplete antibody binding with CD31 molecules and/or an partial binding of secondary antibodies.

### Clinical implications

Although first established in preclinical setting, MVI is nowadays acknowledged as a serious complication of coronary revascularization in patients with acute myocardial infarction. MVI has a poor prognostic value and is associated with adverse cardiac remodeling and mortality [40]. Several therapies has been investigated in clinical setting, which rely on different pathophysiological processes, such as limiting oxidative stress[41, 42], apoptosis suppression[43], and reduction of embolization by thrombotic material[44–46]. Although some promising results have been obtained, none of these therapies are currently standard practice, possibly based on the questionable additive value of MVI therapy. Data from this study suggests that at the moment of revascularization, the cardiac microvasculature is still mostly intact. This implies that vascular protecting strategies could be beneficial on top of mechanical revascularization. Recent findings linking MVI to intramyocardial hemorrhage[47] suggests protecting vascular permeability could be a potential therapy. Endothelial integrity and vascular permeability have been studied in a wide variety of research fields, such as pulmonary edema, oncology and the blood-brain barrier[48–50]. This has produced multiple candidates for the therapy of microvascular injury, such as the use of imatinib [51] statins [52] and complement inhibitors [53]. Furthermore, the presence of intramyocardial hemorrhage[11] suggests the current use of peri-procedural anticoagulant drugs in patients undergoing angioplasty needs to be further investigated.

There are some limitations to the current study. First, microsphere size was very small (0.1  $\mu\text{m}$ ), which is considerably smaller than erythrocytes ( $\pm 7\mu\text{m}$ ). Microsphere extravasation may therefore not be extrapolated to intramyocardial hemorrhage in animals that did not have *in-vivo* reperfusion. Because vascular leakage increases gradually microsphere extravasation can therefore be seen as early loss of endothelial integrity. In a study assessing reperfusion damage in mice, it is shown that infarct size is finalized after 60 minutes, as compared to 24 hours

[54]. Endothelial apoptosis also follows this time course, with a peak at 1 hour after ischemia [55]. This does not mean however that vascular integrity is stable 60 minutes after reperfusion. Our data shows that 60 minutes of reperfusion have an additional harmful effect on endothelial cells, as compared to ischemia alone. However, there are several studies indicating that the extent of MVI reaches its maximum in the period after 1h of reperfusion [7, 8].

## Conclusion

In the acute setting of myocardial infarction reperfusion is mostly responsible for the damage to the coronary microcirculation, inducing endothelial cell dysfunction and death, and increased vascular leakage, whereas ischemia alone has limited effect. This implies that a therapeutic window is available to maintain endothelial integrity directly upon coronary revascularization.

## Acknowledgments

This study was supported by the Institute for Cardiovascular Research of the VU University of Amsterdam (ICaR-VU). GPvNA was supported by the Netherlands Heart Foundation (NHF) (The Hague, grant 2011T072). The funders had no role in study design, data collection and analysis, decision to publish, or preparation of the manuscript.

## Author Contributions

Conceived and designed the experiments: NvR AH HN GvNA MH. Performed the experiments: MH GdW RMvP CvdB NP. Analyzed the data: HdV PvdV JA GvNA PH HN AH NvR LK. Wrote the paper: MH GdW PH HN AH NvR.

## References

1. Regenfus M, Schlundt C, Krahnert R, Schonegger C, Adler W, Ludwig J, et al. Six-Year Prognostic Value of Microvascular Obstruction After Reperfused ST-Elevation Myocardial Infarction as Assessed by Contrast-Enhanced Cardiovascular Magnetic Resonance *Am J Cardiol*. 2015. doi: S0002-9149(15)01615-X [pii]; doi: [10.1016/j.amjcard.2015.06.034](https://doi.org/10.1016/j.amjcard.2015.06.034)
2. Teunissen PF, de Waard GA, Hollander MR, Robbers LF, Danad I, Biesbroek PS, et al. Doppler-derived intracoronary physiology indices predict the occurrence of microvascular injury and microvascular perfusion deficits after angiographically successful primary percutaneous coronary intervention. *Circ Cardiovasc Interv*. 2015; 8(3):e001786. doi: CIRCINTERVENTIONS.114.001786 [pii]; doi: [10.1161/CIRCINTERVENTIONS.114.001786](https://doi.org/10.1161/CIRCINTERVENTIONS.114.001786) PMID: [25717044](https://pubmed.ncbi.nlm.nih.gov/25717044/)
3. Morishima I, Sone T, Okumura K, Tsuboi H, Kondo J, Mukawa H, et al. Angiographic no-reflow phenomenon as a predictor of adverse long-term outcome in patients treated with percutaneous transluminal coronary angioplasty for first acute myocardial infarction. *J Am Coll Cardiol*. 2000; 36(4):1202–9. doi: S0735-1097(00)00865-2 [pii]. PMID: [11028471](https://pubmed.ncbi.nlm.nih.gov/11028471/)
4. Harrison RW, Aggarwal A, Ou FS, Klein LW, Rumsfeld JS, Roe MT, et al. Incidence and outcomes of no-reflow phenomenon during percutaneous coronary intervention among patients with acute myocardial infarction. *Am J Cardiol*. 2013; 111(2):178–84. doi: S0002-9149(12)02193-5 [pii]; doi: [10.1016/j.amjcard.2012.09.015](https://doi.org/10.1016/j.amjcard.2012.09.015) PMID: [23111142](https://pubmed.ncbi.nlm.nih.gov/23111142/)
5. Kloner RA, Ganote CE, Whalen DA Jr., Jennings RB. Effect of a transient period of ischemia on myocardial cells. II. Fine structure during the first few minutes of reflow. *Am J Pathol*. 1974; 74(3):399–422. PMID: [4814895](https://pubmed.ncbi.nlm.nih.gov/4814895/)
6. Kloner RA, Fishbein MC, Hare CM, Maroko PR. Early ischemic ultrastructural and histochemical alterations in the myocardium of the rat following coronary artery occlusion. *Exp Mol Pathol*. 1979; 30(2):129–43. doi: 0014-4800(79)90050-9 [pii]. PMID: [421866](https://pubmed.ncbi.nlm.nih.gov/421866/)
7. Amado LC, Kraitchman DL, Gerber BL, Castillo E, Boston RC, Grayzel J, et al. Reduction of "no-reflow" phenomenon by intra-aortic balloon counterpulsation in a randomized magnetic resonance imaging experimental study. *J Am Coll Cardiol*. 2004; 43(7):1291–8. doi: [10.1016/j.jacc.2003.11.034](https://doi.org/10.1016/j.jacc.2003.11.034) S0735109704001020 [pii]. PMID: [15063444](https://pubmed.ncbi.nlm.nih.gov/15063444/)

8. Gerber BL, Rochitte CE, Melin JA, McVeigh ER, Bluemke DA, Wu KC, et al. Microvascular obstruction and left ventricular remodeling early after acute myocardial infarction. *Circulation*. 2000; 101(23):2734–41. PMID: [10851212](#)
9. Betgem RP, de Waard GA, Nijveldt R, Beek AM, Escaned J, van RN. Intramyocardial haemorrhage after acute myocardial infarction. *Nat Rev Cardiol*. 2015; 12(3):156–67. doi: [nrcardio.2014.188](#) [pii]; doi: [10.1038/nrcardio.2014.188](#) PMID: [25403783](#)
10. Kloner RA, Alker KJ. The effect of streptokinase on intramyocardial hemorrhage, infarct size, and the no-reflow phenomenon during coronary reperfusion. *Circulation*. 1984; 70(3):513–21. PMID: [6744555](#)
11. Robbers LF, Eerenberg ES, Teunissen PF, Jansen MF, Hollander MR, Horrevoets AJ, et al. Magnetic resonance imaging-defined areas of microvascular obstruction after acute myocardial infarction represent microvascular destruction and haemorrhage. *Eur Heart J*. 2013; 34(30):2346–53. doi: [eht100](#) [pii]; doi: [10.1093/eurheartj/eht100](#) PMID: [23594591](#)
12. Hamirani YS, Wong A, Kramer CM, Salerno M. Effect of microvascular obstruction and intramyocardial hemorrhage by CMR on LV remodeling and outcomes after myocardial infarction: a systematic review and meta-analysis. *JACC Cardiovasc Imaging*. 2014; 7(9):940–52. doi: [S1936-878X\(14\)00493-8](#) [pii]; doi: [10.1016/j.jcmg.2014.06.012](#) PMID: [25212800](#)
13. Naaijkens BA, Krijnen PA, Meinster E, Ter Horst EN, Vo K, Musters RJ, et al. Acute myocardial infarction does not affect functional characteristics of adipose-derived stem cells in rats, but reduces the number of stem cells in adipose tissue. *Cell Tissue Res*. 2015. doi: [10.1007/s00441-015-2239-z](#)
14. Handoko ML, Lamberts RR, Redout EM, de Man FS, Boer C, Simonides WS, et al. Right ventricular pacing improves right heart function in experimental pulmonary arterial hypertension: a study in the isolated heart. *Am J Physiol Heart Circ Physiol*. 2009; 297(5):H1752–H9. doi: [00555.2009](#) [pii]; doi: [10.1152/ajpheart.00555.2009](#) PMID: [19734361](#)
15. Reffelmann T, Hale SL, Li G, Kloner RA. Relationship between no reflow and infarct size as influenced by the duration of ischemia and reperfusion. *Am J Physiol Heart Circ Physiol*. 2002; 282(2):H766–H72. doi: [10.1152/ajpheart.00767.2001](#) PMID: [11788428](#)
16. Bruder O, Breuckmann F, Jensen C, Jochims M, Naber CK, Barkhausen J, et al. Prognostic impact of contrast-enhanced CMR early after acute ST segment elevation myocardial infarction (STEMI) in a regional STEMI network: results of the "Herzinfarktverbund Essen". *Herz*. 2008; 33(2):136–42. doi: [10.1007/s00059-008-3102-8](#) PMID: [18344033](#)
17. Chouchani ET, Pell VR, Gaude E, Aksentijevic D, Sundier SY, Robb EL, et al. Ischaemic accumulation of succinate controls reperfusion injury through mitochondrial ROS. *Nature*. 2014; 515(7527):431–5. doi: [nature13909](#) [pii]; doi: [10.1038/nature13909](#) PMID: [25383517](#)
18. Limalanathan S, Andersen GO, Klow NE, Abdelnoor M, Hoffmann P, Eritsland J. Effect of ischemic postconditioning on infarct size in patients with ST-elevation myocardial infarction treated by primary PCI results of the POSTEMI (Postconditioning in ST-Elevation Myocardial Infarction) randomized trial. *J Am Heart Assoc*. 2014; 3(2):e000679. doi: [jah3477](#) [pii]; doi: [10.1161/JAHA.113.000679](#) PMID: [24760962](#)
19. Fernandez-Jimenez R, Garcia-Prieto J, Sanchez-Gonzalez J, Aguero J, Lopez-Martin GJ, Galan-Arriola C, et al. Pathophysiology Underlying the Bimodal Edema Phenomenon After Myocardial Ischemia/Reperfusion. *J Am Coll Cardiol*. 2015; 66(7):816–28. doi: [S0735-1097\(15\)02836-3](#) [pii]; doi: [10.1016/j.jacc.2015.06.023](#) PMID: [26271065](#)
20. Ge L, Zhou X, Ji WJ, Lu RY, Zhang Y, Zhang YD, et al. Neutrophil extracellular traps in ischemia-reperfusion injury-induced myocardial no-reflow: therapeutic potential of DNase-based reperfusion strategy. *Am J Physiol Heart Circ Physiol*. 2015; 308(5):H500–H9. doi: [ajpheart.00381.2014](#) [pii]; doi: [10.1152/ajpheart.00381.2014](#) PMID: [25527775](#)
21. Marzilli M, Sambuceti G, Fedele S, L'Abbate A. Coronary microcirculatory vasoconstriction during ischemia in patients with unstable angina. *J Am Coll Cardiol*. 2000; 35(2):327–34. doi: [S0735-1097\(99\)00554-9](#) [pii]. PMID: [10676677](#)
22. Nanobashvili J, Neumayer C, Fuegl A, Blumer R, Prager M, Sporn E, et al. Development of 'no-reflow' phenomenon in ischemia/reperfusion injury: failure of active vasomotility and not simply passive vasoconstriction. *Eur Surg Res*. 2003; 35(5):417–24. doi: [72226](#) [doi]; [72226](#) [pii]. PMID: [12928599](#)
23. Skovsted GF, Kruse LS, Larsen R, Pedersen AF, Trautner S, Sheykhzade M, et al. Heart ischaemia-reperfusion induces local up-regulation of vasoconstrictor endothelin ETB receptors in rat coronary arteries downstream of occlusion. *Br J Pharmacol*. 2014; 171(11):2726–38. doi: [10.1111/bph.12606](#) PMID: [24467585](#)
24. Bache RJ, Cobb FR, Greenfield JC Jr. Myocardial blood flow distribution during ischemia-induced coronary vasodilation in the unanesthetized dog. *J Clin Invest*. 1974; 54(6):1462–72. doi: [10.1172/JCI107894](#) PMID: [4279928](#)

25. Ambrosio G, Weisman HF, Mannisi JA, Becker LC. Progressive impairment of regional myocardial perfusion after initial restoration of postischemic blood flow. *Circulation*. 1989; 80(6):1846–61. PMID: [2598442](#)
26. Clarke M, Bennett M, Littlewood T. Cell death in the cardiovascular system. *Heart*. 2007; 93(6):659–64. doi: [hrt.2006.088203](#) [pii]; doi: [10.1136/hrt.2006.088203](#) PMID: [16547202](#)
27. Neil DA, Lynch SV, Hardie IR, Effenev DJ. Cold storage preservation and warm ischaemic injury to isolated arterial segments: endothelial cell injury. *Am J Transplant*. 2002; 2(5):400–9. PMID: [12123204](#)
28. Kloner RA, Rude RE, Carlson N, Maroko PR, DeBoer LW, Braunwald E. Ultrastructural evidence of microvascular damage and myocardial cell injury after coronary artery occlusion: which comes first?. *Circulation*. 1980; 62(5):945–52. PMID: [7418179](#)
29. Lleres D, James J, Swift S, Norman DG, Lamond AI. Quantitative analysis of chromatin compaction in living cells using FLIM-FRET. *J Cell Biol*. 2009; 187(4):481–96. doi: [jcb.200907029](#) [pii]; doi: [10.1083/jcb.200907029](#) PMID: [19948497](#)
30. Das M, Das DK. Caveolae, caveolin, and cavins: potential targets for the treatment of cardiac disease. *Ann Med*. 2012; 44(6):530–41. doi: [10.3109/07853890.2011.577445](#) PMID: [21651441](#)
31. Panneerselvam M, Patel HH, Roth DM. Caveolins and heart diseases. *Adv Exp Med Biol*. 2012; 729:145–56. doi: [10.1007/978-1-4614-1222-9\\_10](#) PMID: [22411319](#)
32. Nagy JA, Dvorak AM, Dvorak HF. Vascular hyperpermeability, angiogenesis, and stroma generation. *Cold Spring Harb Perspect Med*. 2012; 2(2):a006544. doi: [10.1101/cshperspect.a006544](#) a006544 [pii]. PMID: [22355795](#)
33. Milovanova T, Chatterjee S, Hawkins BJ, Hong N, Sorokina EM, Debolt K, et al. Caveolae are an essential component of the pathway for endothelial cell signaling associated with abrupt reduction of shear stress. *Biochim Biophys Acta*. 2008; 1783(10):1866–75. doi: [S0167-4889\(08\)00167-5](#) [pii]; doi: [10.1016/j.bbamcr.2008.05.010](#) PMID: [18573285](#)
34. Wallez Y, Huber P. Endothelial adherens and tight junctions in vascular homeostasis, inflammation and angiogenesis. *Biochim Biophys Acta*. 2008; 1778(3):794–809. doi: [S0005-2736\(07\)00346-X](#) [pii]; doi: [10.1016/j.bbamem.2007.09.003](#) PMID: [17961505](#)
35. Waldow T, Witt W, Janke A, Ulmer A, Buzin A, Matschke K. Cell-cell junctions and vascular endothelial growth factor in rat lung as affected by ischemia/reperfusion and preconditioning with inhaled nitric oxide. *J Surg Res*. 2009; 157(1):30–42. doi: [S0022-4804\(08\)00525-8](#) [pii]; doi: [10.1016/j.jss.2008.07.042](#) PMID: [19500802](#)
36. Bolton SJ, Anthony DC, Perry VH. Loss of the tight junction proteins occludin and zonula occludens-1 from cerebral vascular endothelium during neutrophil-induced blood-brain barrier breakdown in vivo. *Neuroscience*. 1998; 86(4):1245–57. doi: [S0306-4522\(98\)00058-X](#) [pii]. PMID: [9697130](#)
37. Pomfy M, Huska J. The state of the microcirculatory bed after total ischaemia of the brain. An experimental ultrastructural study. *Funct Dev Morphol*. 1992; 2(4):253–8. PMID: [1303109](#)
38. Devarajan P. Update on mechanisms of ischemic acute kidney injury. *J Am Soc Nephrol*. 2006; 17(6):1503–20. doi: [ASN.2006010017](#) [pii]; doi: [10.1681/ASN.2006010017](#) PMID: [16707563](#)
39. Camilleri JP, Nlom MO, Joseph D, Michel JB, Barres D, Mignot J. Capillary perfusion patterns in reperfused ischemic subendocardial myocardium: experimental study using fluorescent dextran. *Exp Mol Pathol*. 1983; 39(1):89–99. doi: [0014-4800\(83\)90043-6](#) [pii]. PMID: [6192013](#)
40. Ndrepepa G, Tiroch K, Fusaro M, Keta D, Seyfarth M, Byrne RA, et al. 5-year prognostic value of no-reflow phenomenon after percutaneous coronary intervention in patients with acute myocardial infarction. *J Am Coll Cardiol*. 2010; 55(21):2383–9. doi: [S0735-1097\(10\)01058-2](#) [pii]; doi: [10.1016/j.jacc.2009.12.054](#) PMID: [20488311](#)
41. Chen M, Li H, Wang Y. Protection by atorvastatin pretreatment in patients undergoing primary percutaneous coronary intervention is associated with the lower levels of oxygen free radicals. *J Cardiovasc Pharmacol*. 2013; 62(3):320–4. doi: [10.1097/FJC.0b013e31829be05b](#) PMID: [23714773](#)
42. Jiang F, Yang J, Zhang L, Li R, Zhuo L, Sun L, et al. Rosuvastatin reduces ischemia-reperfusion injury in patients with acute coronary syndrome treated with percutaneous coronary intervention. *Clin Cardiol*. 2014; 37(9):530–5. doi: [10.1002/clc.22292](#) PMID: [25156269](#)
43. Tramontano AF, Muniyappa R, Black AD, Blendea MC, Cohen I, Deng L, et al. Erythropoietin protects cardiac myocytes from hypoxia-induced apoptosis through an Akt-dependent pathway. *Biochem Biophys Res Commun*. 2003; 308(4):990–4. doi: [S0006291X03015031](#) [pii]. PMID: [12927817](#)
44. Nilsen DW, Mehran R, Wu RS, Yu J, Nordrehaug JE, Brodie BR, et al. Coronary reperfusion and clinical outcomes after thrombus aspiration during primary percutaneous coronary intervention: findings from the HORIZONS-AMI trial. *Catheter Cardiovasc Interv*. 2013; 82(4):594–601. doi: [10.1002/ccd.24705](#) PMID: [23074151](#)

45. Sardella G, Mancone M, Bucciarelli-Ducci C, Agati L, Scardala R, Carbone I, et al. Thrombus aspiration during primary percutaneous coronary intervention improves myocardial reperfusion and reduces infarct size: the EXPIRA (thrombectomy with export catheter in infarct-related artery during primary percutaneous coronary intervention) prospective, randomized trial. *J Am Coll Cardiol*. 2009; 53(4):309–15. doi: [10.1016/j.jacc.2008.10.017](https://doi.org/10.1016/j.jacc.2008.10.017) PMID: [19161878](https://pubmed.ncbi.nlm.nih.gov/19161878/)
46. Carrick D, Oldroyd KG, McEntegart M, Haig C, Petrie MC, Eteiba H, et al. A randomized trial of deferred stenting versus immediate stenting to prevent no- or slow-reflow in acute ST-segment elevation myocardial infarction (DEFER-STEMI). *J Am Coll Cardiol*. 2014; 63(20):2088–98. doi: [10.1016/j.jacc.2014.02.530](https://doi.org/10.1016/j.jacc.2014.02.530) PMID: [24583294](https://pubmed.ncbi.nlm.nih.gov/24583294/)
47. Carrick D, Haig C, Ahmed N, McEntegart M, Petrie MC, Eteiba H, et al. Myocardial Hemorrhage After Acute Reperfused ST-Segment-Elevation Myocardial Infarction: Relation to Microvascular Obstruction and Prognostic Significance. *Circ Cardiovasc Imaging*. 2016; 9(1):e004148. doi: [10.1161/CIRCIMAGING.115.004148](https://doi.org/10.1161/CIRCIMAGING.115.004148) PMID: [26763281](https://pubmed.ncbi.nlm.nih.gov/26763281/)
48. Huang X, Dai Z, Cai L, Sun K, Cho J, Albertine KH, et al. Endothelial p110gammaPI3K Mediates Endothelial Regeneration and Vascular Repair After Inflammatory Vascular Injury. *Circulation*. 2016; 133(11):1093–103. doi: [10.1161/CIRCULATIONAHA.115.020918](https://doi.org/10.1161/CIRCULATIONAHA.115.020918) PMID: [26839042](https://pubmed.ncbi.nlm.nih.gov/26839042/)
49. Agrawal V, Maharjan S, Kim K, Kim NJ, Son J, Lee K, et al. Direct endothelial junction restoration results in significant tumor vascular normalization and metastasis inhibition in mice. *Oncotarget*. 2014; 5(9):2761–77. doi: [10.18632/oncotarget.1942](https://doi.org/10.18632/oncotarget.1942) PMID: [24811731](https://pubmed.ncbi.nlm.nih.gov/24811731/)
50. Johnson HL, Hanson LM, Chen Y, Bieber AJ, Buono RJ, Ferraro TN, et al. Quantitative trait loci analysis reveals candidate genes implicated in regulating functional deficit and CNS vascular permeability in CD8 T cell-initiated blood-brain barrier disruption. *BMC Genomics*. 2013; 14:678. doi: [10.1186/1471-2164-14-678](https://doi.org/10.1186/1471-2164-14-678) PMID: [24090483](https://pubmed.ncbi.nlm.nih.gov/24090483/)
51. Aman J, van BJ, Damanafshan A, Huvencuers S, Eringa EC, Vogel SM, et al. Effective treatment of edema and endothelial barrier dysfunction with imatinib. *Circulation*. 2012; 126(23):2728–38. doi: [10.1161/CIRCULATIONAHA.112.134304](https://doi.org/10.1161/CIRCULATIONAHA.112.134304) PMID: [23099479](https://pubmed.ncbi.nlm.nih.gov/23099479/)
52. Phinikaridou A, Andia ME, Protti A, Indermuehle A, Shah A, Smith A, et al. Noninvasive magnetic resonance imaging evaluation of endothelial permeability in murine atherosclerosis using an albumin-binding contrast agent. *Circulation*. 2012; 126(6):707–19. doi: [10.1161/CIRCULATIONAHA.112.092098](https://doi.org/10.1161/CIRCULATIONAHA.112.092098) PMID: [22753191](https://pubmed.ncbi.nlm.nih.gov/22753191/)
53. Liu D, Zhang D, Scafidi J, Wu X, Cramer CC, Davis AE, III. C1 inhibitor prevents Gram-negative bacterial lipopolysaccharide-induced vascular permeability. *Blood*. 2005; 105(6):2350–5. doi: [10.1182/blood-2004-05-1963](https://doi.org/10.1182/blood-2004-05-1963) PMID: [15522962](https://pubmed.ncbi.nlm.nih.gov/15522962/)
54. Yang Z, Linden J, Berr SS, Kron IL, Beller GA, French BA. Timing of adenosine 2A receptor stimulation relative to reperfusion has differential effects on infarct size and cardiac function as assessed in mice by MRI. *Am J Physiol Heart Circ Physiol*. 2008; 295(6):H2328–H35. doi: [10.1152/ajpheart.00091.2008](https://doi.org/10.1152/ajpheart.00091.2008) PMID: [18849340](https://pubmed.ncbi.nlm.nih.gov/18849340/)
55. Scarabelli T, Stephanou A, Rayment N, Pasini E, Comini L, Curello S, et al. Apoptosis of endothelial cells precedes myocyte cell apoptosis in ischemia/reperfusion injury. *Circulation*. 2001; 104(3):253–6. PMID: [11457740](https://pubmed.ncbi.nlm.nih.gov/11457740/)
